# Supplementary material
Source: PubMed Central journal article supplement (PMC4136711)

## SUPPORTING INFORMATION

### Discovery of a Selective, Substrate-competitive Inhibitor of the Lysine Methyltransferase

#### SETD8

*Anqi Ma,<sup>‡,†</sup> Wenyu Yu,<sup>§,†</sup> Fengling Li,<sup>§</sup> Rachel M. Bleich,<sup>‡</sup> J. Martin Herold,<sup>‡</sup> Kyle V. Butler,<sup>‡</sup>  
Jacqueline L. Norris,<sup>‡</sup> Victoria Korboukh,<sup>‡</sup> Ashutosh Tripathy,<sup>¶</sup> William P. Janzen,<sup>‡</sup> Cheryl H.  
Arrowsmith,<sup>§</sup> Stephen V. Frye,<sup>‡</sup> Masoud Vedadi,<sup>§,†</sup> Peter J. Brown,<sup>§</sup> and Jian Jin<sup>\*,‡,○,#</sup>*

#### Table of Contents

|    |                                                   |    |
|----|---------------------------------------------------|----|
| A. | <sup>1</sup> H NMR spectrum of compound <b>1</b>  | S2 |
| B. | <sup>13</sup> C NMR spectrum of compound <b>1</b> | S3 |

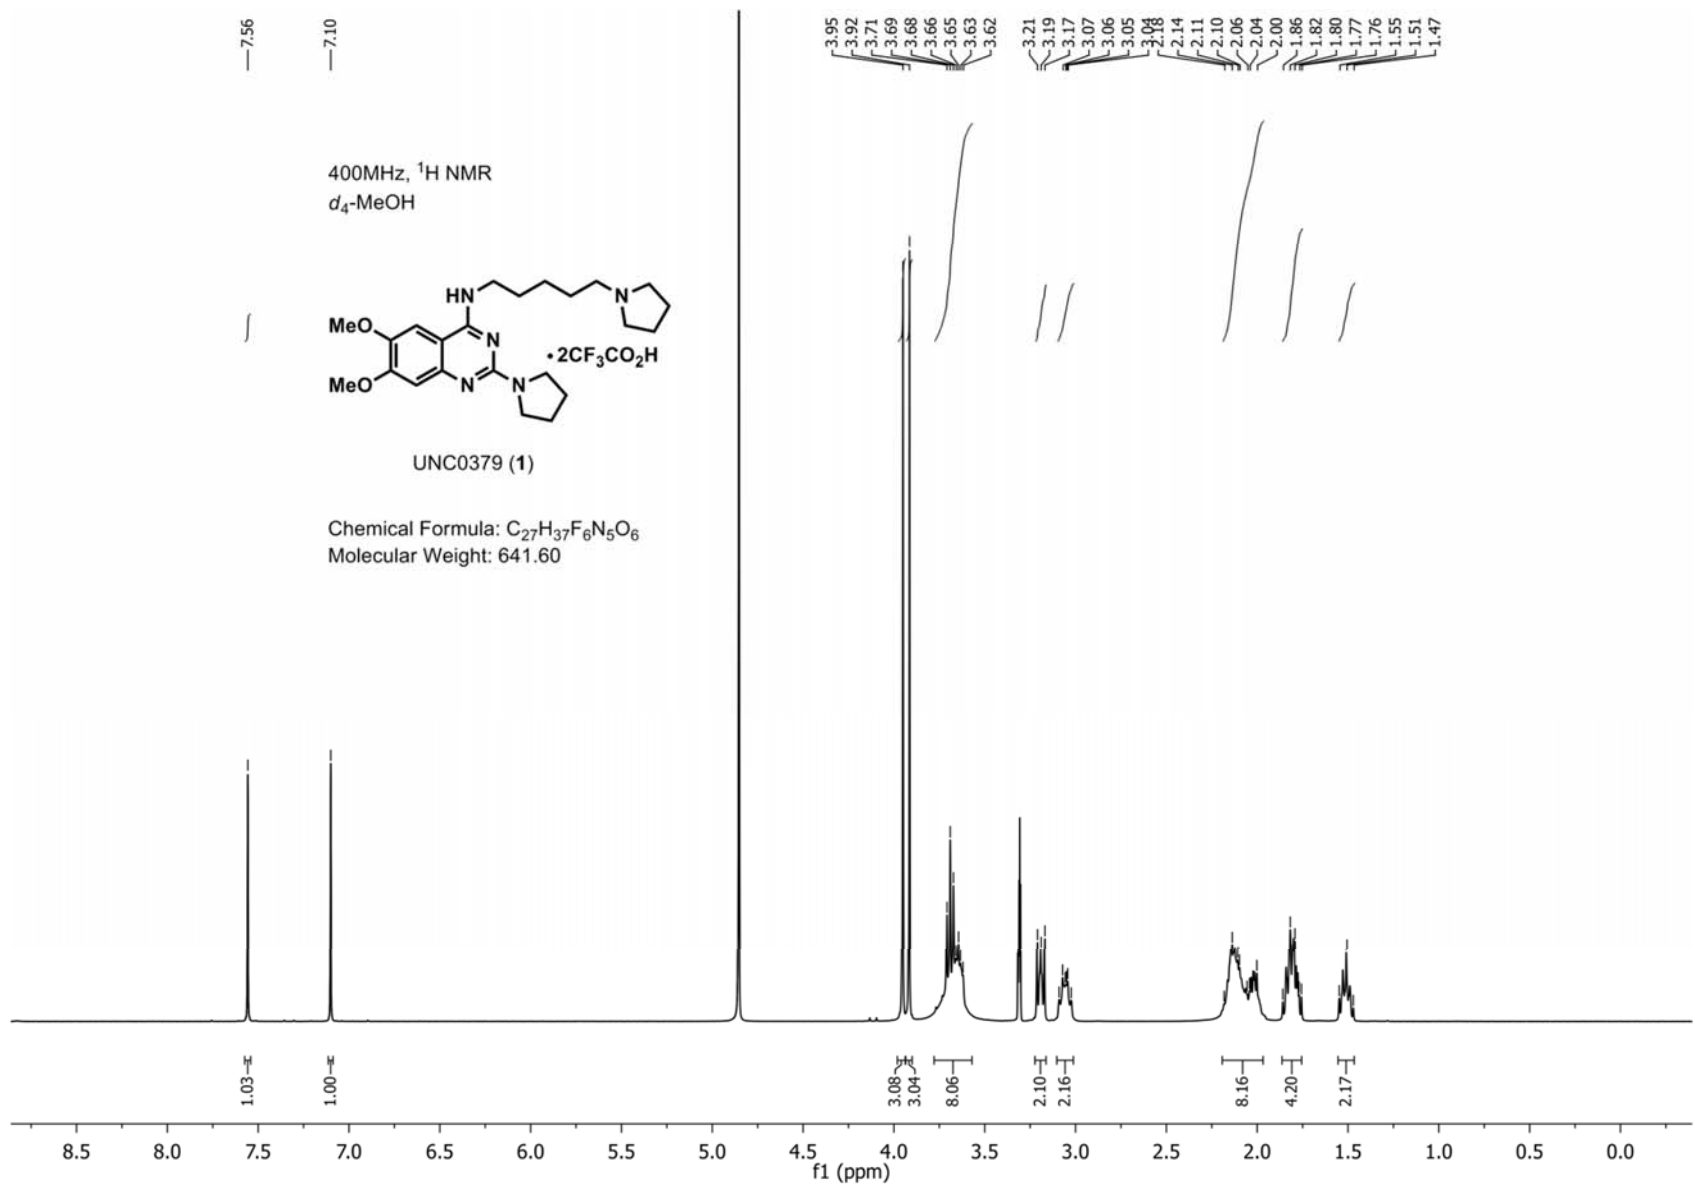

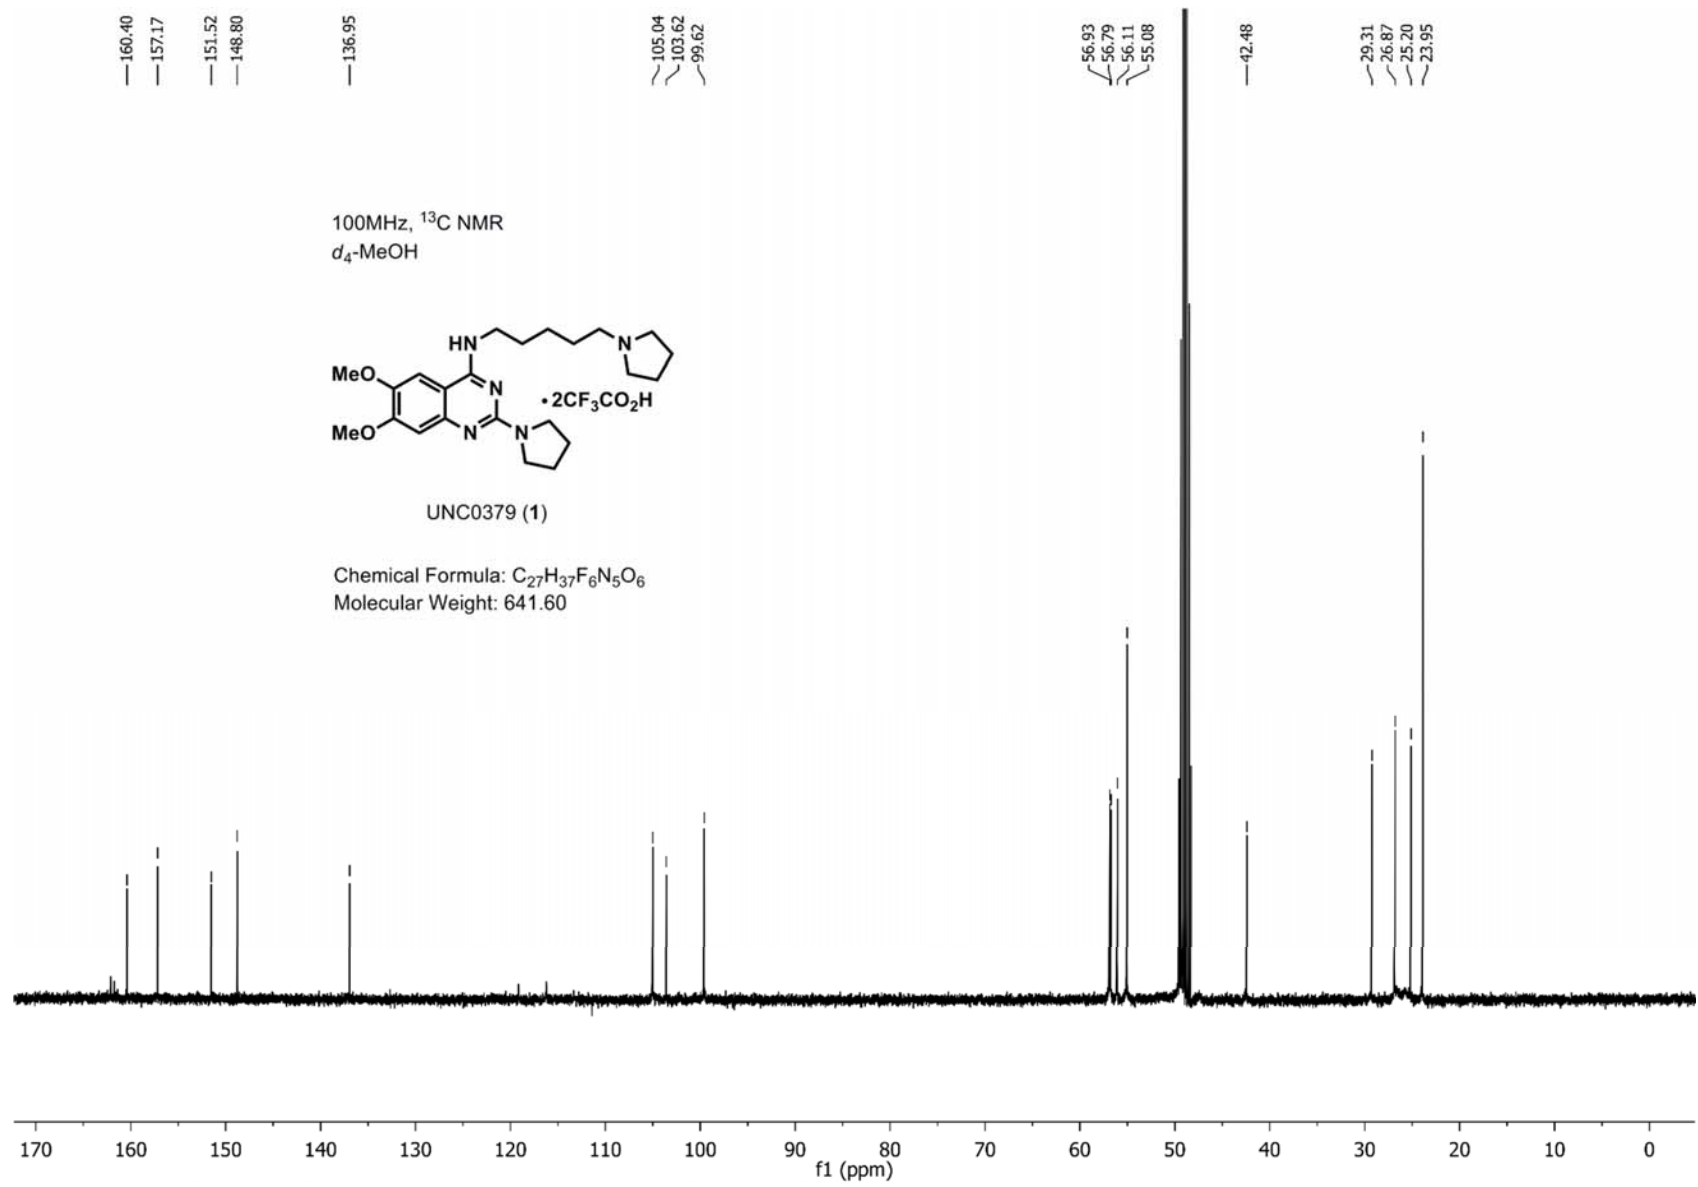

Supplement: jm500871s_si_001.pdf [file jm500871s_si_001.pdf]
